# Supplementary material
Source: MDPI journal article supplement (https://www.mdpi.com/2073-4441/12/1/290)
Supplement: s1 [file s1]

**Figure S1.** (a) Daily rainfall (mm/d) and the lagoon's water levels between 2000 and 2018. The storm events larger than 40 mm/d are less frequent after 2010; (b) Daily streamflow records ( $\text{m}^3/\text{s}$ ) for Pintué streamgauge and lagoon's water levels. No records of streamflow at Pintué have been available since 2011; (c) Daily Maximum (blue), average (yellow), and minimum (red) temperatures for the Aculeo Basin; (d) Monthly rainfall (mm) accumulation (left-axis), and monthly streamflow ( $\text{m}^3/\text{s}$ ) at Pintué streamgauge (right-axis); (e) Average Monthly Water Levels at Aculeo Lagoon (meters); (f) Monthly maximum and average temperature at Aculeo Basin.

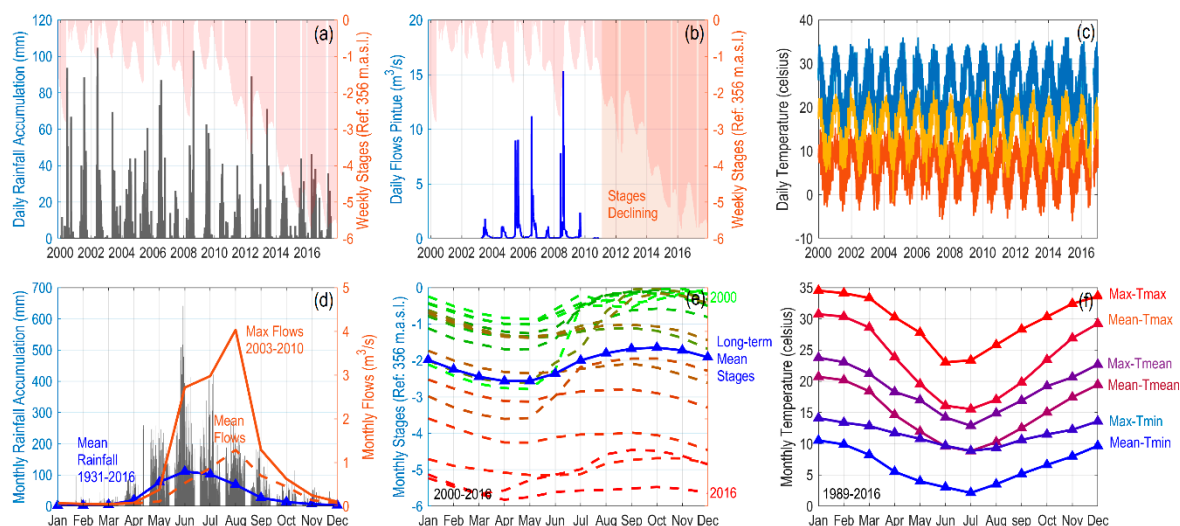

**Table S1.** Geodatabase used in this study.

| Data                         | Type            | Period         | Temporal Resolution | Spatial Resolution | Source           |
|------------------------------|-----------------|----------------|---------------------|--------------------|------------------|
| Rainfall Accumulation        | Pluviometers    | 1930-2018      | Daily               | 4 locations        | DGA              |
| Evapotranspiration           | Evaporimeters   | 2006/2012/2018 | Annual              | 30 meters          | DGA              |
| Streamflow                   | Streamgauges    | 2003-2012      | Daily               | 1 location         | DGA              |
| Lagoon Stage                 | Staff gage      | 1999-2017      | Weekly              | 1 location         | Local Water User |
| Stratigraphy                 | Boreholes       | Multiple       | One-Time            | 57 locations       | DGA              |
| Groundwater Levels           | Boreholes       | Multiple       | Monthly             | 57 locations       | DGA              |
| Vertical Electrical Sounding | Sounding Points | 2018           | One-Time            | 12 locations       | GEOEXPLORACIONES |
| Land Use                     | Land Use        | 2006/2012/2018 | One-Time            | 30 meters          | LANDSAT          |
| Digital Elevation Model      | Topography      | 2014           | One-Time            | 30 meters          | NASA             |

**Table S2.** Simplified Categories of Lithographic Sedimentation and Rock Basement Used in the Development of the Aculeo Geological Model (AGM).

| Texture           | Category      | Composition                                         | Hydraulic Conductivity (m/d) |
|-------------------|---------------|-----------------------------------------------------|------------------------------|
| Fine to very Fine | Very Fine     | clay, limo-arcilloso y arcilla limosa               | $\leq 0.079056$              |
|                   | Fine          | Incluye franco-arcilloso-arenoso,                   | $\leq 0.243648$              |
|                   |               | franco-limoso-arcilloso y franco-arcilloso          |                              |
| Medium            | Medium Fine   | Incluye arcilla-arenosa, franco-limoso, limo-franco | $\leq 0.792288$              |
|                   | Medium Coarse | Incluye franco-arenoso                              | $\leq 2.43864$               |
|                   | Coarse        | Incluye arenas y arenas finas                       | $\leq 7.926336$              |

|                          |             |                                                              |                   |
|--------------------------|-------------|--------------------------------------------------------------|-------------------|
| Coarse to very<br>Coarse | Very Coarse | Incluye arenas gruesas, arenas muy gruesas y coca fracturada | 12.194496 - 25.92 |
| Rock basement            | Rock        | Rock                                                         | $\leq 0.0181$     |

**Table 3.** Summary of the Main MODFLOW Packages Used in This Study.

| Name | Package Name                   | Type of Package                     | Description                                                                            |
|------|--------------------------------|-------------------------------------|----------------------------------------------------------------------------------------|
| FHB  | Flow and Head Boundary Package | Specified fluctuation boundary      | Flow and head are used as boundary condition                                           |
| RCH  | Recharge Package               | Specified fluctuation boundary      | Utilizes recharge values in the simulation domain                                      |
| WEL  | Well Package                   | Specified fluctuation boundary      | Utilizes groundwater pumping values from wells in the simulation domain                |
| EVT  | Evapotranspiration Package     | Head-dependent fluctuation boundary | Utilizes evapotranspiration values in the simulation domain                            |
| LAK  | Lake Package                   | Head-dependent fluctuation boundary | Utilizes the parameters of the lagoon and its interaction with the groundwater         |
| STR  | Stream Package                 | Head-dependent fluctuation boundary | Utilizes the parameters associated to the presence of streams in the simulation domain |
| HOB  | Head Observation Package       | Observation process input files     | Utilizes head observation to calibrate the model                                       |
| NWT  | Solver Package                 | Newton Solver                       | A Newton formulation for MODFLOW 2005.                                                 |
